# Supplementary material for: Quantitative Rapid Magnetic Immunoassay for Sensitive Toxin Detection in Food: Non-Covalent Functionalization of Nanolabels vs. Covalent Immobilization
Source: MDPI journal article supplement (doi:10.3390/toxins16010005), 2023-12-20
Supplement: s1 [file s1]

### Supplementary Materials:

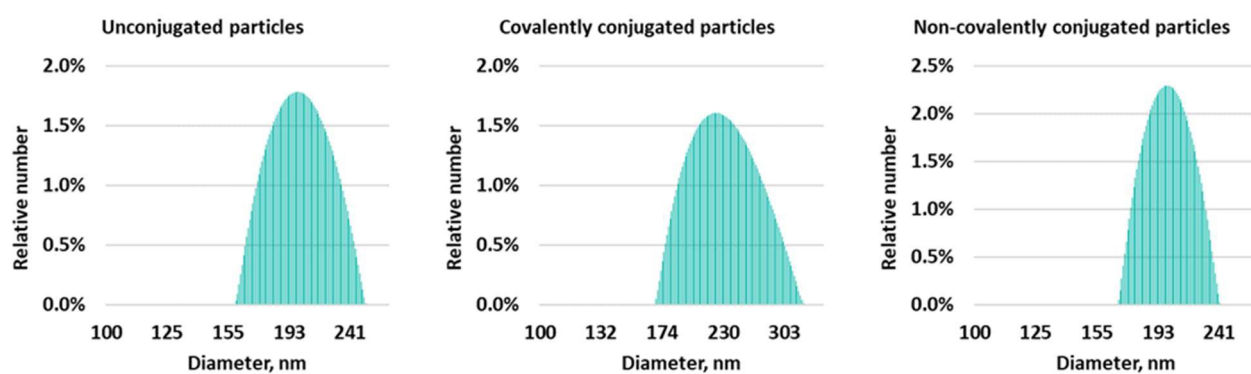

**Figure S1.** DLS characterization of unconjugated (left), covalently conjugated (center), and non-covalently conjugated (right) particles.

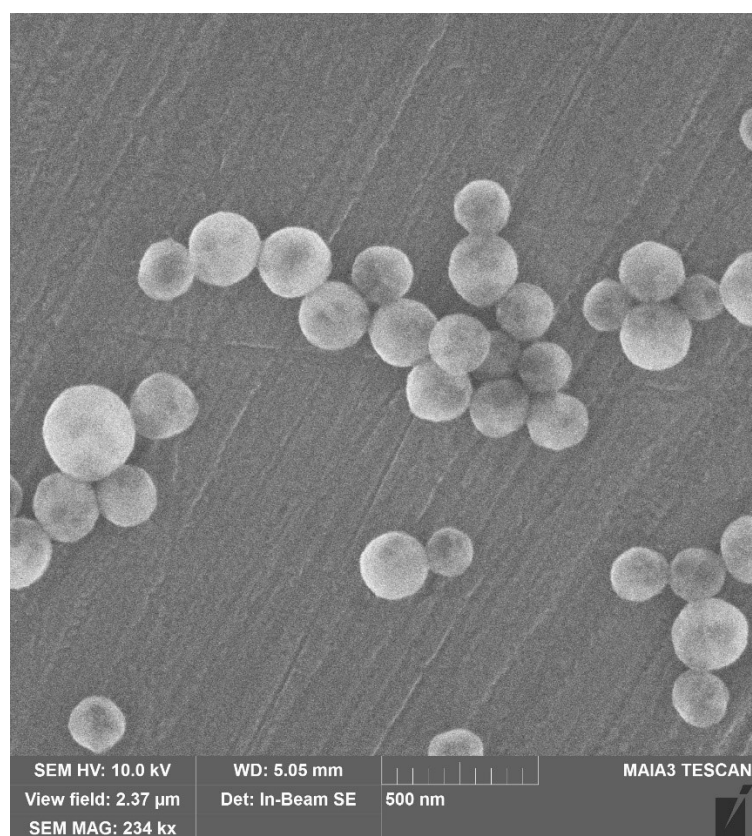

**Figure S2.** SEM images of the magnetic particles used in the study.
